# Supplementary material
Source: PubMed Central journal article supplement (PMC6856935)
Supplement: IMM-158-340-s008.pdf [file IMM-158-340-s008.pdf]

Supplementary Table 1. Primers used in this study.

|                                 |         |                                 |
|---------------------------------|---------|---------------------------------|
| CD33                            | direct  | 5'-GGTCAAAGTTCAGTGCCTTCCTC-3'   |
|                                 | reverse | 5'-TTGAGCATTTAAAACCCCAAAGC-3'   |
| Siglec-E                        | direct  | 5'-CTCAGTGCTAACCATCACCCCT-3'    |
|                                 | reverse | 5'-ATGACACGTTTAGACGGGTGG-3'     |
| Siglec-F                        | direct  | 5'-CCCTGCCTCCACCATAAATGA-3'     |
|                                 | reverse | 5'-CATAGTGGAGTTCAGGCTCATC-3'    |
| Siglec-G                        | direct  | 5'-GAAAATGGCTTAACCGTTCCC-3'     |
|                                 | reverse | 5'-TCCGGAAGAAATAGTTTGTTGAGTC-3' |
| Siglec-H                        | direct  | 5'-CACCCAGCACTCAAACCTACA-3'     |
|                                 | reverse | 5'-AAGGACAGGCATCAGAATAAGG-3'    |
| HPRT                            | direct  | 5'-CCAGCGTCGTGATTAGCGAT-3'      |
|                                 | reverse | 5'-TGGCCTCCCATCTCCTTCAT-3'      |
| iNOS                            | direct  | 5'-CTTGGAGCGAGTTGTGGATTGTC-3'   |
|                                 | reverse | 5'-ATTGTACTCTGAGGGCTGACACA-3'   |
| IL-10                           | direct  | 5'-AGCCGGAAGACAATAACTGC-3'      |
|                                 | reverse | 5'-AACCCAAGTAACCCTTAAAGTCCTG-3' |
| TNF- $\alpha$                   | direct  | 5'-CAAATTCGAGTGACAAGCCTG-3'     |
|                                 | reverse | 5'-ACAAGGTACAACCCATCGGC-3'      |
| STAT5                           | direct  | 5'-CCATGTCCCAGAAGCACCTT-3'      |
|                                 | reverse | 5'-AAACTGAGCTTGGATCCGCA-3'      |
| IL-5 receptor<br>$\alpha$ chain | direct  | 5'-CTGGGACCCAAATCCTGACC-3'      |
|                                 | reverse | 5'-TGGCCAGAGTTGTATGGCTG-3'      |
| GATA1                           | direct  | 5'-TTGGGATCACCCCTGAACTCG-3'     |
|                                 | reverse | 5'-AGAATCCACAAACTGGGGCA-3'      |
| I-A <sup>b</sup> $\alpha$ chain | direct  | 5'-CAGGAGTCAGAAAGGACCTCG-3'     |
|                                 | reverse | 5'-ACTGGCAGTCAGGAATTCGG-3'      |

Supplementary Table 2. siRNAs used in this study.

---

|             |                                                                     |
|-------------|---------------------------------------------------------------------|
| Siglec-F #1 | 5'-GACACAGGAACUAAAGUCCUGCAGA-3'<br>5'-UCUGCAGGACUUUAGUCCUGUGUC-3';  |
| Siglec-F #2 | 5'-UCCACCAUAAAUAGUGCAAGCAUAA-3'<br>5'-UUAUGCUUGCACUAUUUAUGGUGGA-3'; |
| Siglec-F #3 | 5'-GCAGCUACGAAAGGCAACCAUCUUG-3'<br>5'-CAAGAUGGUUGCCUUUCGUAGCUGC-3'. |
| STAT5       | 5'-CCCACUUCAGAAACAUGUCACUGAA-3'<br>5'-UUCAGUGACAUGUUUCUGAAGUGGG-3'. |

---
